# Supplementary material for: Pairing nanoarchitectonics of oligodeoxyribonucleotides with complex diversity: concatemers and self-limited complexes
Source: Royal Society of Chemistry journal article supplement (doi:10.1039/d2ra00155a), 2022-01-01
Supplement: d2ra00155a1.pdf [file d2ra00155a1.pdf]

Supporting Information for

## **Pairing nanoarchitectonics of oligodeoxyribonucleotides with complex diversity: concatemers and self-limited complexes**

**Anastasia A. Zamoskovtseva , Victor M. Golyshev, Valeria A. Kizilova, Georgiy Yu  
Shevelev, Dmitrii V. Pyshnyi and Alexander A. Lomzov\***

*Anastasia A. Zamoskovtseva<sup>1,2‡</sup>, Victor M. Golyshev<sup>1‡</sup>, Valeria A. Kizilova<sup>1‡</sup>, Georgiy Yu.  
Shevelev<sup>1</sup>, Dmitrii V. Pyshnyi<sup>1</sup> and Alexander A. Lomzov<sup>1\*</sup>*

<sup>1</sup> Institute of Chemical Biology and Fundamental Medicine, SB RAS, 8 Lavrentiev Avenue,  
Novosibirsk 630090. Russia

<sup>2</sup> Moscow Institute of Physics and Technology, 9 Institutskiy per., Dolgoprudny, 141701, Russia

\*Corresponding author:  
lomzov@niboch.nsc.ru

## Table of Contents

|                                                   |            |
|---------------------------------------------------|------------|
| <b>Theoretical analysis</b>                       | <b>S3</b>  |
| <b>Gel shift assay analysis</b>                   | <b>S6</b>  |
| <b>Thermal denaturation analysis</b>              | <b>S10</b> |
| <b>Atomic force microscopy</b>                    | <b>S12</b> |
| <b>Molecular dynamics simulation and analysis</b> | <b>S15</b> |

## Theoretical analysis

In accordance with the thermodynamic scheme in Figure 2, the emergence of a bimolecular self-limited complex in the presence of the **S** component can be described by the following equations:

$$\begin{aligned}
 [\text{MN}^{11}] &= K_2 \cdot [\text{M}] \cdot [\text{N}] \\
 [\text{MN}^{22}] &= K_1 \cdot [\text{M}] \cdot [\text{N}] \\
 [\text{MN}^*] &= K_1 \cdot K_{h2} \cdot [\text{M}] \cdot [\text{N}] \\
 [\text{NS}] &= K_s \cdot [\text{N}] \cdot [\text{S}] \\
 [\text{MNS}] &= K \cdot K_s \cdot [\text{M}] \cdot [\text{N}] \cdot [\text{S}]
 \end{aligned} \tag{1}$$

where  $K_{1,2,h1,h2,s,s2} = \exp(-\Delta G^0_{1,2,h1,h2,s,s2}(T)/R/T) = \exp(-(\Delta H^0_{1,2,h1,h2,s,s2} - T \cdot \Delta S^0_{1,2,h1,h2,s,s2})/R/T)$  are equilibrium constants of the formation of intermolecular complexes by fragment 1, 2, or **s**, whereas  $K_{h1}$  or  $K_{h2}$  are equilibrium constants of intramolecular complex formation ( $T$ : temperature,  $K$ ;  $R$ : gas constant,  $1.987 \text{ cal}\cdot\text{K}^{-1}\cdot\text{mol}^{-1}$ ). In combination with mass balance equations (2) for oligonucleotides **M**, **N**, and **S**, the above formulas give a system of algebraic equations

$$\begin{aligned}
 [\text{M}]_0 &= [\text{MN}^{11}] + [\text{MN}^{22}] + [\text{NS}] + [\text{MNS}] + [\text{MN}^*] + [\text{M}] \\
 [\text{N}]_0 &= [\text{MN}^{11}] + [\text{MN}^{22}] + [\text{MNS}] + [\text{MN}^*] + [\text{N}] \\
 [\text{S}]_0 &= [\text{NS}] + [\text{MNS}] + [\text{S}].
 \end{aligned} \tag{2}$$

For simplicity's sake, in the theoretical analysis, thermal stability levels of blocks 1 and 2 were assumed to be the same ( $K_1 = K_2 = K$  and therefore  $K_{h1} = K_{h2} = K_h$ ), and equimolar total concentrations of **M** and **N** were postulated ( $[\text{M}]_0 = [\text{N}]_0$ ). This approach significantly decreases the complexity of the analysis, similarly to the analysis for a concatemer complex that we described in our previous papers [22,37]. We used a numerical solver for the system of equations (1, 2) to determine **M**, **N**, and **S** at given concentrations ( $[\text{M}]_0 = [\text{N}]_0$ ,  $[\text{S}]_0$ ), thermodynamic parameters ( $\Delta H^0_{1,2,h,s}$  and  $\Delta S^0_{1,2,h,s}$ ), and temperature ( $T$ ).

For a given  $[\text{M}]_0$ , the equilibrium among all oligonucleotides' forms can be shifted to one side or another if  $[\text{S}]_0$ ,  $K_s$ , or both are changed.  $K_s$  values can be varied by means of the temperature or by changing the length and/or nucleotide composition of the **s** block or buffering conditions (by changing  $\Delta H^0$  and  $\Delta S^0$ ). By adjusting these two parameters, we can open a bimolecular self-limited complex. Examination of the redistribution of components' concentrations in solution (using, for example, gel electrophoresis) under the influence of changes in the binding constant (i.e., temperature) or in the **S** component concentration will help to prove the formation of bimolecular V-shaped complexes or complexes higher molecularity. The latter ploy is easily implemented at a constant temperature. A suitable range of changes in **S** concentration—for the detection by gel electrophoresis—is a 10-fold deficiency to a 10-fold excess relative to  $[\text{M}]_0$ .

In the presence of linear and circular tetramolecular (or higher-order) complexes, the

thermodynamic analysis was hampered considerably. The algebraic equations for determining the concentrations will have a higher degree and a very narrow convergence region. Therefore, the system of equations cannot be solved numerically by relatively simple methods. Nonetheless, the proposed approach of **S** component concentration variation can help determine molecularity values of self-limited complexes. Gradual addition of **S** to self-limited tetramolecular complex  $M_2N_2^*$  (Figure 1d) yields linear penta- ( $M_2N_2S$ ) (Figure 1m) and trimolecular ( $MNS$ ) (Figure 1l) complexes. The detection of such components during a stepwise increase of “opener” concentration is a way to determine the molecularity of the complex.

Typical melting curves calculated as changes in concentration of all single-stranded blocks during a temperature increase for non-lengthened **S** oligomers and those lengthened by 4 nt are shown in Figure S1.

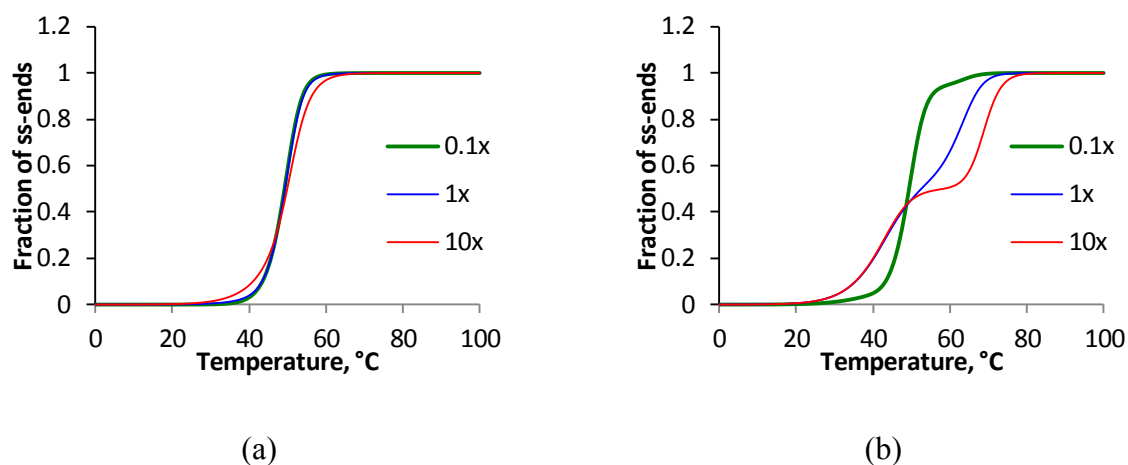

**Figure S1.** Calculated thermal denaturation curves for the proposed thermodynamic scheme at different **S** concentrations: **(a)** non-lengthened complex M20D/N20D in the presence of S10; **(b)** M20D/N20Dl complex of oligomers with a lengthened **s** block in the presence of S10l.

**Table S1.** Thermodynamic parameters used in theoretical analysis of M20/N20 complex

| <b>Sequence 5'-&gt;3'</b> | <b><math>\Delta H^0</math><br/>cal/mol</b> | <b><math>\Delta S^0</math><br/>cal/mol/K</b> | <b><math>T_m</math>, °C</b> |
|---------------------------|--------------------------------------------|----------------------------------------------|-----------------------------|
| CTAACTAACG                | -69255                                     | -195                                         | 42.1                        |
| CCATCATATG                | -69473                                     | -197                                         | 41.5                        |
| CTAACTAACGCGAC            | -104401                                    | -287                                         | 62.4                        |
| CTAACTAACGCGA             | -93711                                     | -257                                         | 59.5                        |
| CTAACTAACGCG              | -87179                                     | -240                                         | 56.8                        |
| CTAACTAACGC               | -79279                                     | -221                                         | 49.9                        |

Additional penalty for intramolecular complex formation ( $K_h$ ) was taken -14 cal/mol/K of only entropic contribution.

## Gel shift assay analysis

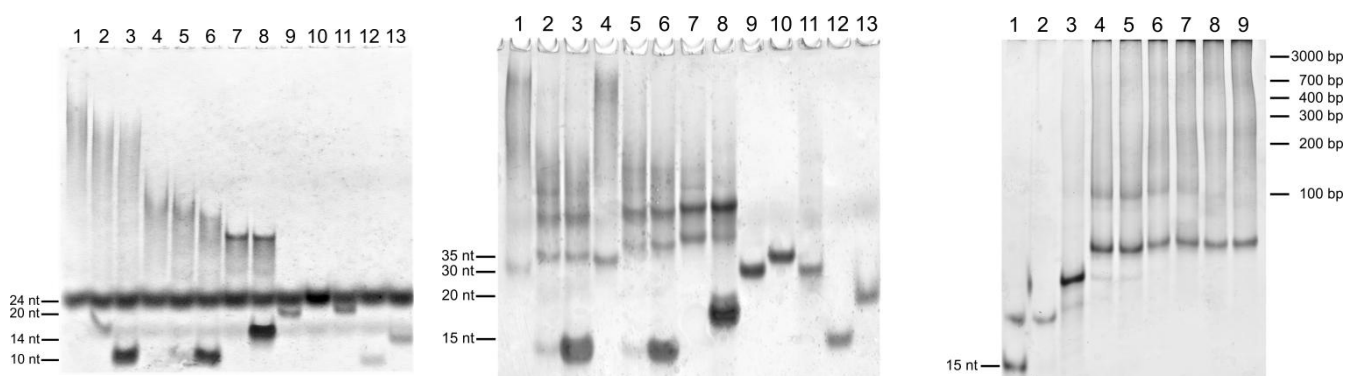

(a)

(b)

(c)

**Figure S2.** The gel shift assay of oligonucleotides' complexes of various lengths without linkers.

**(a)** Lanes: 1, M20/N20 (1:1); 2, M20/N20/S10 (1:1:1); 3, M20/N20/S10 (1:1:10); 4, M20/N20I (1:1); 5, M20/N20I/S10 (1:1:1); 6, M20/N20I/S10 (1:1:10); 7, M20/N20I/S10I (1:1:1); 8, M20/N20I/S10I (1:1:10); 9, N20; 10, N20I; 11, M20; 12, S10; 13, S10I.

**(b)** Lanes: 1, M30/N30 (1:1); 2, M30/N30/S15 (1:1:1); 3, M30/N30/S15 (1:1:10); 4, M30I/N30 (1:1); 5, M30I/N30/S15 (1:1:1); 6, M30I/N30/S15 (1:1:10); 7, M30I/N30/S15I (1:1:1); 8, M30I/N30/S15I (1:1:10); 9, M30; 10, M30I; 11, N30; 12, S15; 13, S15I.

**(c)** Lanes: 1, ladder; 2, M40/SX15 (2:1); 3, M40/SX15 (1:1); 4, M40/S15/S25 (1:1:1); 5, M40/N40/SX15 (1:1:10); 6, M40/N40/SX15 (1:1:5); 7, M40/N40/SX15 (1:1:1); 8, M40/N40/SX15 (1:1:0.5); 9, M40/N40/SX15 (1:1:0.1); 10, M40/N40 (1:1) (experiment at 15 °C).

| (a)  |                        | (b)  |                        | (c)  |                        |
|------|------------------------|------|------------------------|------|------------------------|
| Line | Sample                 | Line | Sample                 | Line | Sample                 |
| 1    | M20/N20 (1:1)          | 1    | M30/N30                | 1    | ladder                 |
| 2    | M20/N20/S10 (1:1:1)    | 2    | M30/N30/S15 (1:1:1)    | 2    | M40/SX15 (2:1)         |
| 3    | M20/N20/S10 (1:1:10)   | 3    | M30/N30/S15 (1:1:10)   | 3    | M40/SX15 (1:1)         |
| 4    | M20/N20I (1:1)         | 4    | M30I/N30 (1:1)         | 4    | M40/S15/S25 (1:1:1)    |
| 5    | M20/N20I/S10 (1:1:1)   | 5    | M30I/N30/S15 (1:1:1)   | 5    | M40/N40/SX15 (1:1:10)  |
| 6    | M20/N20I/S10 (1:1:10)  | 6    | M30I/N30/S15 (1:1:10)  | 6    | M40/N40/SX15 (1:1:5)   |
| 7    | M20/N20I/S10I (1:1:1)  | 7    | M30I/N30/S15I (1:1:1)  | 7    | M40/N40/SX15 (1:1:1)   |
| 8    | M20/N20I/S10I (1:1:10) | 8    | M30I/N30/S15I (1:1:10) | 8    | M40/N40/SX15 (1:1:0.5) |
| 9    | N20                    | 9    | M30                    | 9    | M40/N40/SX15 (1:1:0.1) |
| 10   | N20I                   | 10   | M30I                   | 10   | M40/N40 (1:1)          |
| 11   | M20                    | 11   | N30                    |      |                        |
| 12   | S10                    | 12   | S15                    |      |                        |
| 13   | S10I                   | 13   | S15I                   |      |                        |

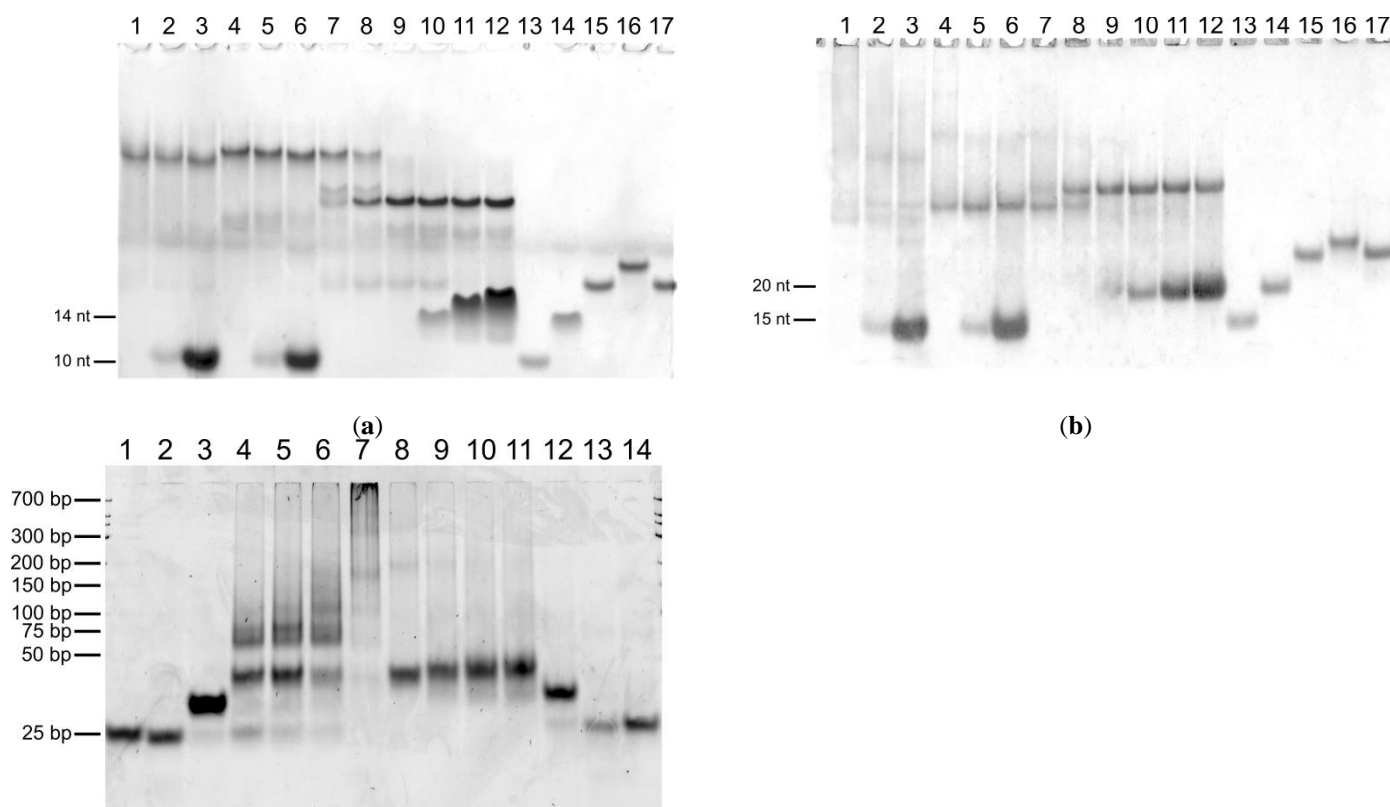

(a)

**Figure S3.** Determination of complex molecularity. Gel shift assay of oligonucleotides' complexes of various lengths carrying non-nucleotide linkers and different concentration of the S component: (a) Lanes: 1, M20D/N20D (1:1); 2, M20D/N20D/S10 (1:1:1); 3, M20D/N20D/S10 (1:1:10); 4, M20D/N20DI (1:1); 5, M20D/N20DI/S10 (1:1:1); 6, M20D/N20DI/S10 (1:1:10); 7, M20D/N20DI/S10I (1:1:0.25); 8, M20D/N20DI/S10I (1:1:0.5); 9, M20D/N20DI/S10I (1:1:1); 10, M20D/N20DI/S10I (1:1:2); 11, M20D/N20DI/S10I (1:1:5); 12, M20D/N20DI/S10I (1:1:10); 13, S10I; 14, S10I; 15, N20D; 16, N20DI; 17, M20D.

(b)

(b) Lanes: 1, M30/N30 (1:1); 2, M30/N30/S15 (1:1:1); 3, M30/N30/S15 (1:1:10); 4, M30DI/N30D (1:1); 5, M30DI/N30D/S15 (1:1:1); 6, M30DI/N30D/S15 (1:1:10); 7, M30DI/N30D/S15I (1:1:0.25); 8, M30DI/N30D/S15I (1:1:0.5); 9, M30DI/N30D/S15I (1:1:1); 10, M30DI/N30D/S15I (1:1:2); 11, M30DI/N30D/S15I (1:1:5); 12, M30DI/N30D/S15I (1:1:10); 13, S15I; 14, S15I; 15, M30D; 16, M30DI; 17, N30D.

(c) Lanes: 1, ladder 25-700 bp. (Fermentas, Latvia); 2, M30/S15 (1:1); 3, M30/S15-2 (1:1); 4, M30/S15/S15-2 (1:1:1); 5, M30/N30/S15 (1:1:10); 6, M30/N30/S15 (1:1:5); 7, M30/N30/S15 (1:1:1); 8, M30/N30 (1:1); 9, M30D/N30D (1:1); 10, M30D/N30D/S15 (1:1:1); 11, M30D/N30D/S15 (1:1:5); 12, M30D/N30D/S15 (1:1:10); 13, M30D/S15/S15-2 (1:1:1); 14, M30D/S15-2 (1:1); 15, M30D/S15 (1:1). 16, ladder 25-700 bp. (Fermentas, Latvia). This gel shift assay was performed under specific conditions: it was run in a 15% polyacrylamide gel in a 39:1 ratio; SYBR Green I 10000X (Invitrogen, USA) was used to stain the gel.

| (a)  |                            | (b)  |                            | (c)  |                        |
|------|----------------------------|------|----------------------------|------|------------------------|
| Line | Sample                     | Line | Sample                     | Line | Sample                 |
| 1    | M20D/N20D (1:1)            | 1    | M30/N30 (1:1)              | 1    | ladder 25-700 bp       |
| 2    | M20D/N20D/S10 (1:1:1)      | 2    | M30/N30/S15 (1:1:1)        | 2    | M30/S15 (1:1)          |
| 3    | M20D/N20D/S10 (1:1:10)     | 3    | M30/N30/S15 (1:1:10)       | 3    | M30/S15-2 (1:1)        |
| 4    | M20D/N20DI (1:1)           | 4    | M30DI/N30D (1:1)           | 4    | M30/S15/S15-2 (1:1:1)  |
| 5    | M20D/N20DI/S10 (1:1:1)     | 5    | M30DI/N30D/S15 (1:1:1)     | 5    | M30/N30/S15 (1:1:10)   |
| 6    | M20D/N20DI/S10 (1:1:10)    | 6    | M30DI/N30D/S15 (1:1:10)    | 6    | M30/N30/S15 (1:1:5)    |
| 7    | M20D/N20DI/S10l (1:1:0.25) | 7    | M30DI/N30D/S15l (1:1:0.25) | 7    | M30/N30/S15 (1:1:1)    |
| 8    | M20D/N20DI/S10l (1:1:0.5)  | 8    | M30DI/N30D/S15l (1:1:0.5)  | 8    | M30/N30 (1:1)          |
| 9    | M20D/N20DI/S10l (1:1:1)    | 9    | M30DI/N30D/S15l (1:1:1)    | 9    | M30D/N30D (1:1)        |
| 10   | M20D/N20DI/S10l (1:1:2)    | 10   | M30DI/N30D/S15l (1:1:2)    | 10   | M30D/N30D/S15 (1:1:1)  |
| 11   | M20D/N20DI/S10l (1:1:5)    | 11   | M30DI/N30D/S15l (1:1:5)    | 11   | M30D/N30D/S15 (1:1:5)  |
| 12   | M20D/N20DI/S10l (1:1:10)   | 12   | M30DI/N30D/S15l (1:1:10)   | 12   | M30D/N30D/S15 (1:1:10) |
| 13   | S10                        | 13   | S15                        | 13   | M30D/S15/S15-2 (1:1:1) |
| 14   | S10l                       | 14   | S15l                       | 14   | M30D/S15-2 (1:1)       |
| 15   | N20D                       | 15   | M30D                       | 15   | M30D/S15 (1:1)         |
| 16   | N20DI                      | 16   | M30DI                      | 16   | ladder 25-700 bp       |
| 17   | M20D                       | 17   | N30D                       |      |                        |



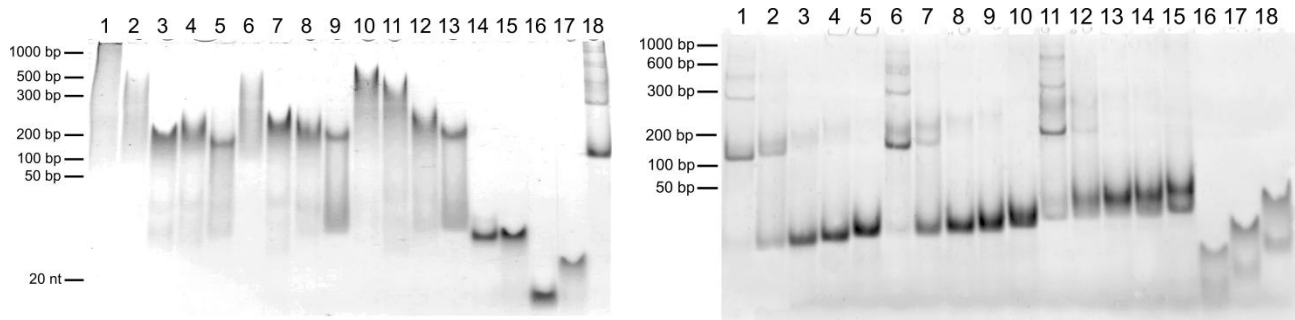

(a)

(b)

**Figure S4.** Gel shift assay of oligonucleotide complexes carrying nucleotide linkers of various lengths. **(a)** Lanes: 0. ladder 50-1000 bp (SibEnzyme, Russia); 1, M20/N20; 2, M20T1/N20; 3, M20T2/N20; 4, M20T3/N20; 5, M20T5/N20; 6, M20T1/N20T1; 7, M20T2/N20T1; 8, M20T3/N20T1; 9, M20T5/N20T1; 10. M20T1/N20T2; 11, M20T2/N20T2; 12, M20T3/N20T2; 13, M20T5/N20T2; 14, N20T1; 15, N20T2; 16, M20; 17, N20; 18, M20/N20T3;

**(b)** Lanes: 0. ladder 50-1000 bp (SibEnzyme, Russia); 1, M20T7/N20; 2, M20T7/N20T1; 3, M20T7/N20T2; 4, M20T7/N20T3; 5, M20T7/N20T5; 6, M20T10/N20; 7, M20T10/N20T1; 8, M20T10/N20T2; 9, M20T10/N20T3; 10. M20T10/N20T5; 11, M20T15/N20; 12, M20T15/N20T1; 13, M20T15/N20T2; 14, M20T15/N20T3; 15, M20T15/N20T5; 16, M20T7; 17, M20T10; 18, M20T15.

| (a)  |             | (b)  |              |
|------|-------------|------|--------------|
| Line | Sample      | Line | Sample       |
| 1    | M20/N20     | 1    | M20T7/N20    |
| 2    | M20T1/N20   | 2    | M20T7/N20T1  |
| 3    | M20T2/N20   | 3    | M20T7/N20T2  |
| 4    | M20T3/N20   | 4    | M20T7/N20T3  |
| 5    | M20T5/N20   | 5    | M20T7/N20T5  |
| 6    | M20T1/N20T1 | 6    | M20T10/N20   |
| 7    | M20T2/N20T1 | 7    | M20T10/N20T1 |
| 8    | M20T3/N20T1 | 8    | M20T10/N20T2 |
| 9    | M20T5/N20T1 | 9    | M20T10/N20T3 |
| 10   | M20T1/N20T2 | 10   | M20T10/N20T5 |
| 11   | M20T2/N20T2 | 11   | M20T15/N20   |
| 12   | M20T3/N20T2 | 12   | M20T15/N20T1 |
| 13   | M20T5/N20T2 | 13   | M20T15/N20T2 |
| 14   | N20T1       | 14   | M20T15/N20T3 |
| 15   | N20T2       | 15   | M20T15/N20T5 |
| 16   | M20         | 16   | M20T7        |
| 17   | N20         | 17   | M20T10       |
| 18   | M20/N20T3   | 18   | M20T15       |

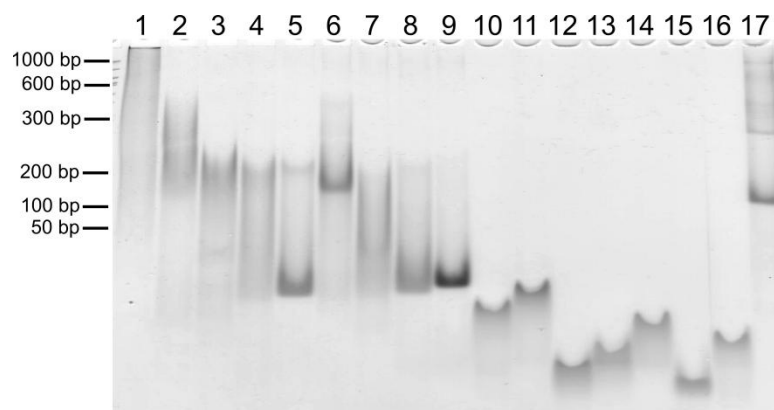

**Figure S5.** Gel shift assay of oligonucleotides complexes carrying nucleotide linkers of various lengths. Lanes: 0. Ladder 50-1000 bp (SibEnzyme, Russia); 1, M20/N20; 2, M20T1/N20T3; 3, M20T2/N20T3; 4, M20T3/N20T3; 5, M20T5/N20T3; 6, M20T1/N20T5; 7, M20T2/N20T5; 8, M20T3/N20T5; 9, M20T5/N20T5; 10. N20T3; 11, N20T5; 12, M20T2; 13, M20T3; 14, M20T5; 15, M20; 16, N20; 17, M20/N20T3.

| Line | Sample      |
|------|-------------|
| 1    | M20/N20     |
| 2    | M20T1/N20T3 |
| 3    | M20T2/N20T3 |
| 4    | M20T3/N20T3 |
| 5    | M20T5/N20T3 |
| 6    | M20T1/N20T5 |
| 7    | M20T2/N20T5 |
| 8    | M20T3/N20T5 |
| 9    | M20T5/N20T5 |
| 10   | N20T3       |
| 11   | N20T5       |
| 12   | M20T2       |
| 13   | M20T3       |
| 14   | M20T5       |
| 15   | M20         |
| 16   | N20         |
| 17   | M20/N20T3   |

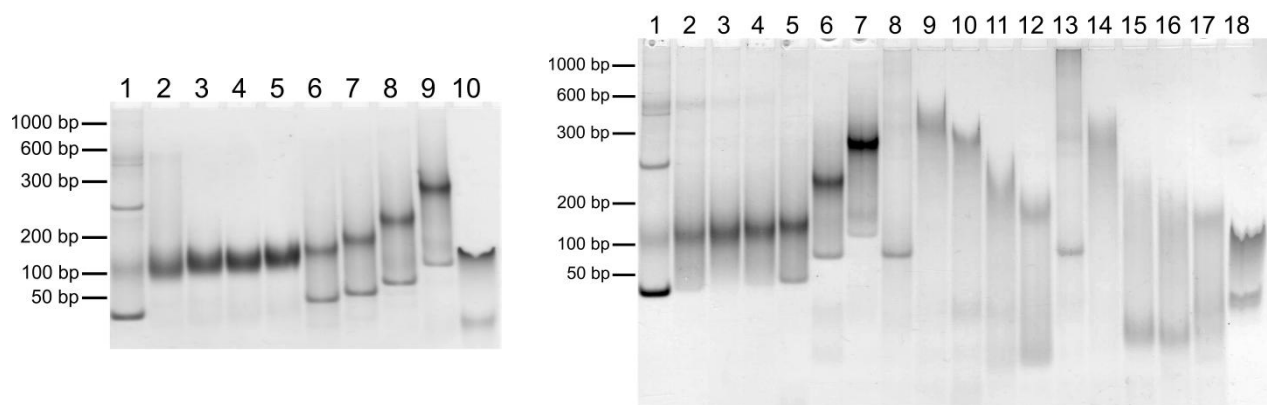

(a)

(b)

**Figure S6.** Gel shift assay of oligonucleotides complexes carrying nucleotide linkers of various lengths: **(a)** Lanes: 1, M20/N20T25; 2, M20T1/N20T25; 3, M20T2/N20T25; 4, M20T3/N20T25; 5, M20T5/N20T25; 6, M20T7/N20T25; 7, M20T10/N20T25; 8, M20T15/N20T25; 9, M20T25/N20T25; 10. N20T25; **(b)** 1, M20T25/N20; 2, M20T25/N20T1; 3, M20T25/N20T2; 4, M20T25/N20T3; 5, M20T25/N20T5; 6, M20T25/N20T15; 7, M20T25/N20T2; 8, M20/N20T2; 9, M20T1/N20T2; 10. M20T2/N20T2; 11, M20T3/N20T2; 12, M20T5/N20T2; 13, M20/N20T2/S10; 14, M20T1/N20T2/S10; 15, M20T2/N20T2/S10; 16, M20T3/N20T2/S10; 17, M20T5/N20T2/S10; 18, M20T25.

| (a)  |               | (b)  |                 |
|------|---------------|------|-----------------|
| Line | Sample        | Line | Sample          |
| 1    | M20/N20T25    | 1    | M20T25/N20      |
| 2    | M20T1/N20T25  | 2    | M20T25/N20T1    |
| 3    | M20T2/N20T25  | 3    | M20T25/N20T2    |
| 4    | M20T3/N20T25  | 4    | M20T25/N20T3    |
| 5    | M20T5/N20T25  | 5    | M20T25/N20T5    |
| 6    | M20T7/N20T25  | 6    | M20T25/N20T15   |
| 7    | M20T10/N20T25 | 7    | M20T25/N20T2    |
| 8    | M20T15/N20T25 | 8    | M20/N20T2       |
| 9    | M20T25/N20T25 | 9    | M20T1/N20T2     |
| 10   | N20T25        | 10   | M20T2/N20T2     |
|      |               | 11   | M20T3/N20T2     |
|      |               | 12   | M20T5/N20T2     |
|      |               | 13   | M20/N20T2/S10   |
|      |               | 14   | M20T1/N20T2/S10 |
|      |               | 15   | M20T2/N20T2/S10 |
|      |               | 16   | M20T3/N20T2/S10 |
|      |               | 17   | M20T5/N20T2/S10 |
|      |               | 18   | M20T25          |

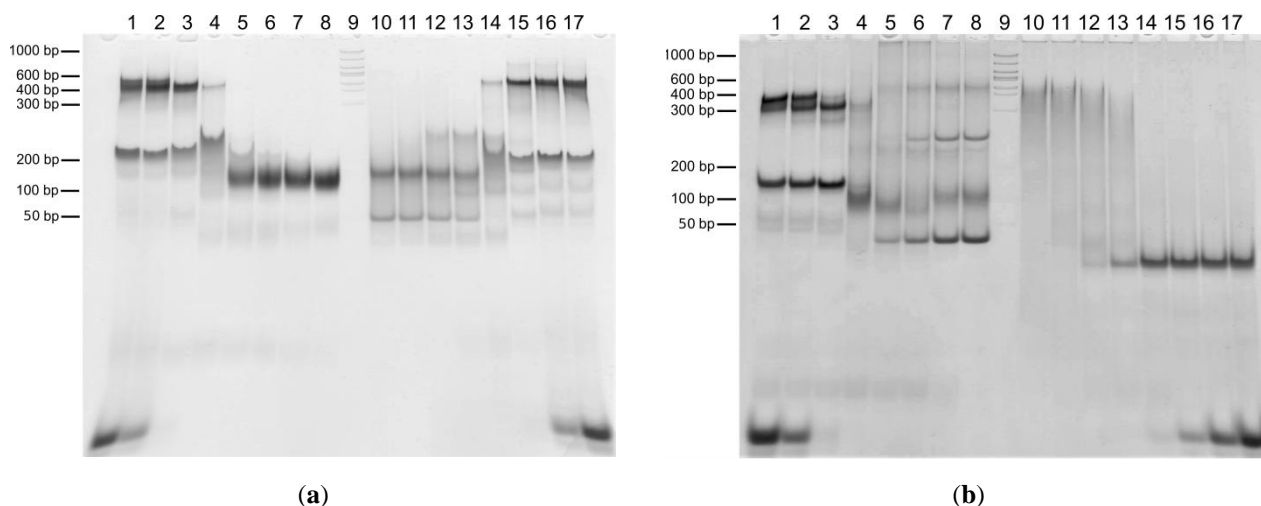

**Figure S7.** Gel shift assay of complexes of oligonucleotides with different concentration of S: **(a)** Lanes: 1, M20T5/N20T25/S10A5 (1:1:10); 2, M20T5/N20T25/S10A5 (1:1:5); 3, M20T5/N20T25/S10A5 (1:1:2); 4, M20T5/N20T25/S10A5 (1:1:1); 5, M20T5/N20T25/S10A5 (1:1:0.5); 6, M20T5/N20T25/S10A5 (1:1:0.25); 7, M20T5/N20T25/S10A5 (1:1:0.1); 8, M20T5/N20T25; 9, Ladder 50-1000 bp (SibEnzyme, Russia); 10. M20T7/N20T25; 11, M20T7/N20T25/S10A5 (1:1:0.1); 12, M20T7/N20T25/S10A5 (1:1:0.25); 13, M20T7/N20T25/S10A5 (1:1:0.5); 14, M20T7/N20T25/S10A5 (1:1:1); 15, M20T7/N20T25/S10A5 (1:1:2); 16, M20T7/N20T25/S10A5 (1:1:5); 17, M20T7/N20T25/S10A5 (1:1:10); **(b)** 1, M20/N20T25/S10A5 (1:1:10); 2, M20/N20T25/S10A5 (1:1:5); 3, M20/N20T25/S10A5 (1:1:2); 4, M20/N20T25/S10A5 (1:1:1); 5, M20/N20T25/S10A5 (1:1:0.5); 6, M20/N20T25/S10A5 (1:1:0.25); 7, M20/N20T25/S10A5 (1:1:0.1); 8, M20/N20T25; 9, Ladder 50-1000 bp (SibEnzyme, Russia); 10. M20T1/N20T2; 11, M20T1/N20T2/S10A5 (1:1:0.1); 12, M20T1/N20T2/S10A5 (1:1:0.25); 13, M20T1/N20T2/S10A5 (1:1:0.5); 14, M20T1/N20T2/S10A5 (1:1:1); 15, M20T1/N20T2/S10A5 (1:1:2); 16, M20T1/N20T2/S10A5 (1:1:5); 17, M20T1/N20T2/S10A5 (1:1:10).

| (a)  |                               | (b)  |                              |
|------|-------------------------------|------|------------------------------|
| Line | Sample                        | Line | Sample                       |
| 1    | M20T5/N20T25/S10A5 (1:1:10)   | 1    | M20/N20T25/S10A5 (1:1:10)    |
| 2    | M20T5/N20T25/S10A5 (1:1:5)    | 2    | M20/N20T25/S10A5 (1:1:5)     |
| 3    | M20T5/N20T25/S10A5 (1:1:2)    | 3    | M20/N20T25/S10A5 (1:1:2)     |
| 4    | M20T5/N20T25/S10A5 (1:1:1)    | 4    | M20/N20T25/S10A5 (1:1:1)     |
| 5    | M20T5/N20T25/S10A5 (1:1:0.5)  | 5    | M20/N20T25/S10A5 (1:1:0.5)   |
| 6    | M20T5/N20T25/S10A5 (1:1:0.25) | 6    | M20/N20T25/S10A5 (1:1:0.25)  |
| 7    | M20T5/N20T25/S10A5 (1:1:0.1)  | 7    | M20/N20T25/S10A5 (1:1:0.1)   |
| 8    | M20T5/N20T25                  | 8    | M20/N20T25                   |
| 9    | Ladder 50-1000 bp             | 9    | Ladder 50-1000 bp            |
| 10   | M20T7/N20T25                  | 10   | M20T1/N20T2                  |
| 11   | M20T7/N20T25/S10A5 (1:1:0.1)  | 11   | M20T1/N20T2/S10A5 (1:1:0.1)  |
| 12   | M20T7/N20T25/S10A5 (1:1:0.25) | 12   | M20T1/N20T2/S10A5 (1:1:0.25) |
| 13   | M20T7/N20T25/S10A5 (1:1:0.5)  | 13   | M20T1/N20T2/S10A5 (1:1:0.5)  |
| 14   | M20T7/N20T25/S10A5 (1:1:1)    | 14   | M20T1/N20T2/S10A5 (1:1:1)    |
| 15   | M20T7/N20T25/S10A5 (1:1:2)    | 15   | M20T1/N20T2/S10A5 (1:1:2)    |
| 16   | M20T7/N20T25/S10A5 (1:1:5)    | 16   | M20T1/N20T2/S10A5 (1:1:5)    |
| 17   | M20T7/N20T25/S10A5 (1:1:10)   | 17   | M20T1/N20T2/S10A5 (1:1:10)   |

## Thermal denaturation analysis

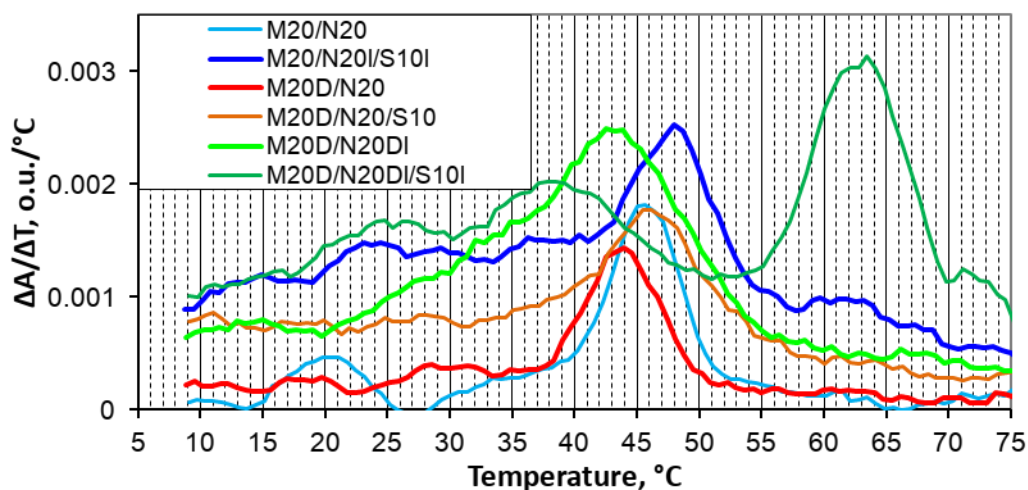

**Figure S8.** Differential UV melting temperatures of “20-series” complexes without S-component and at 10-fold excess.

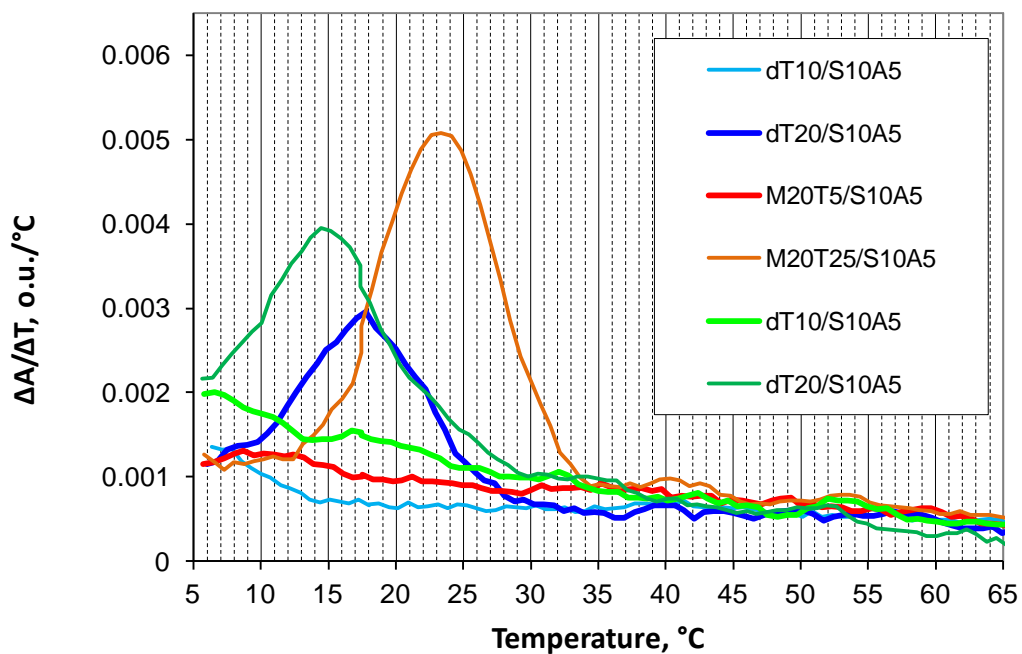

**Figure S9.** Differential UV melting temperatures of S10A5 complexes with particularly complement oligonucleotides.

**Table S2.** Melting temperatures of studied complexes with 10 nt duplex blocks. The number in the columns of the oligonucleotides indicates the concentration of the oligomer in solution  $\times 10^{-5}$  M.

|    | M20 | N20 | M20D | N20D | N20DI | S10 | S10I | T °C  |
|----|-----|-----|------|------|-------|-----|------|-------|
| 1  | 1   | 1   |      |      |       |     |      | 48.6  |
| 2  | 1   | 1   |      |      |       | 10  |      | 49.5  |
| 3  | 1   | 1   |      |      |       |     | 10   | 50    |
| 4  |     | 1   | 1    |      |       |     |      | 45.7  |
| 5  |     | 1   | 1    |      |       | 10  |      | 47    |
| 6  |     | 1   | 1    |      |       |     | 10   | 47    |
| 7  | 1   |     |      | 1    |       |     |      | 44    |
| 8  | 1   |     |      | 1    |       | 10  |      | 44    |
| 9  | 1   |     |      | 1    |       |     | 10   | 44    |
| 10 | 1   |     |      |      | 1     |     |      | 46    |
| 11 | 1   |     |      |      | 1     | 10  |      | 46    |
| 12 | 1   |     |      |      | 1     |     | 10   | 64/41 |
| 13 |     |     | 1    |      | 1     |     |      | 40    |
| 14 |     |     | 1    |      | 1     | 10  |      | 44    |
| 15 |     |     | 1    |      | 1     |     | 10   | 64/39 |
| 16 |     |     | 1    | 1    |       |     |      | 42    |
| 17 |     |     | 1    | 1    |       | 10  |      | 42.5  |
| 18 |     |     | 1    | 1    |       |     | 10   | 42.5  |
| 19 |     | 1   |      |      |       | 10  |      | 47    |
| 20 |     |     |      | 1    |       | 10  |      | 45    |
| 21 |     |     |      |      | 1     | 10  |      | 46    |
| 22 |     | 1   |      |      |       |     | 10   | 47    |
| 23 |     |     |      | 1    |       |     | 10   | 44    |
| 24 |     |     |      |      | 1     |     | 10   | 64    |

**Table S3.** Melting temperatures of studied complexes with 15 nt duplex blocks. The number in the columns of the oligonucleotides indicates the concentration of the oligomer in solution  $\times 10^{-5}$  M.

|     | M30 | N30 | M30D | N30D | M30DI | S15 | S15I | T °C |
|-----|-----|-----|------|------|-------|-----|------|------|
| 1.  | 1   | 1   |      |      |       |     |      | 58   |
| 2.  | 1   | 1   |      |      |       | 10  |      | 59   |
| 3.  | 1   | 1   |      |      |       |     | 10   | 60   |
| 4.  |     | 1   | 1    |      |       |     |      | 58   |
| 5.  |     | 1   | 1    |      |       | 10  |      | 59   |
| 6.  |     | 1   | 1    |      |       |     | 10   | 60   |
| 7.  |     | 1   |      |      | 1     |     |      | 62   |
| 8.  |     | 1   |      |      | 1     | 10  |      | 59   |
| 9.  |     | 1   |      |      | 1     |     | 10   | 68   |
| 10. | 1   |     |      | 1    |       |     |      | 59   |
| 11. | 1   |     |      | 1    |       |     |      | 61   |
| 12. | 1   |     |      | 1    |       |     |      | 61   |
| 13. |     |     | 1    | 1    |       |     |      | 59   |
| 14. |     |     | 1    | 1    |       |     |      | 60   |
| 15. |     |     | 1    | 1    |       |     |      | 61   |
| 16. |     |     |      | 1    | 1     |     |      | 62   |
| 17. |     |     |      | 1    | 1     |     |      | 62   |
| 18. |     |     |      | 1    | 1     |     |      | 68   |
| 19. | 1   |     |      |      |       | 10  |      | 55   |
| 20. |     |     | 1    |      |       | 10  |      | 57   |
| 21. |     |     |      |      | 1     | 10  |      | 56   |
| 22. | 1   |     |      |      |       |     | 10   | 57   |
| 23. |     |     | 1    |      |       |     | 10   | 54   |
| 24. |     |     |      |      | 1     |     | 10   | 68   |

## Atomic force microscopy

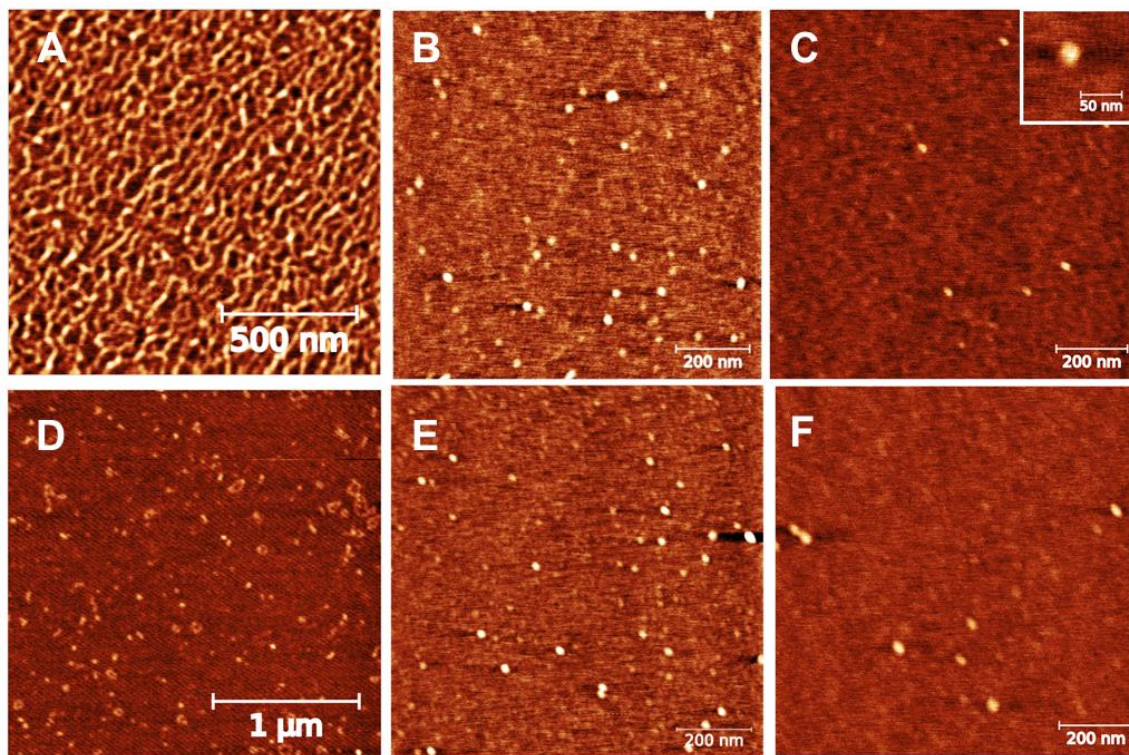

**Figure S10.** Typical AFM images of the studied complexes: concatemer complex M20/N20 with 90 seconds (A) and 15 seconds (D) exposition, self-limited complex M20D/N20D1 with 45 seconds (B) and 30 seconds (E) exposition, trimolecular complex M20D/N20D1/S101 (C and F).

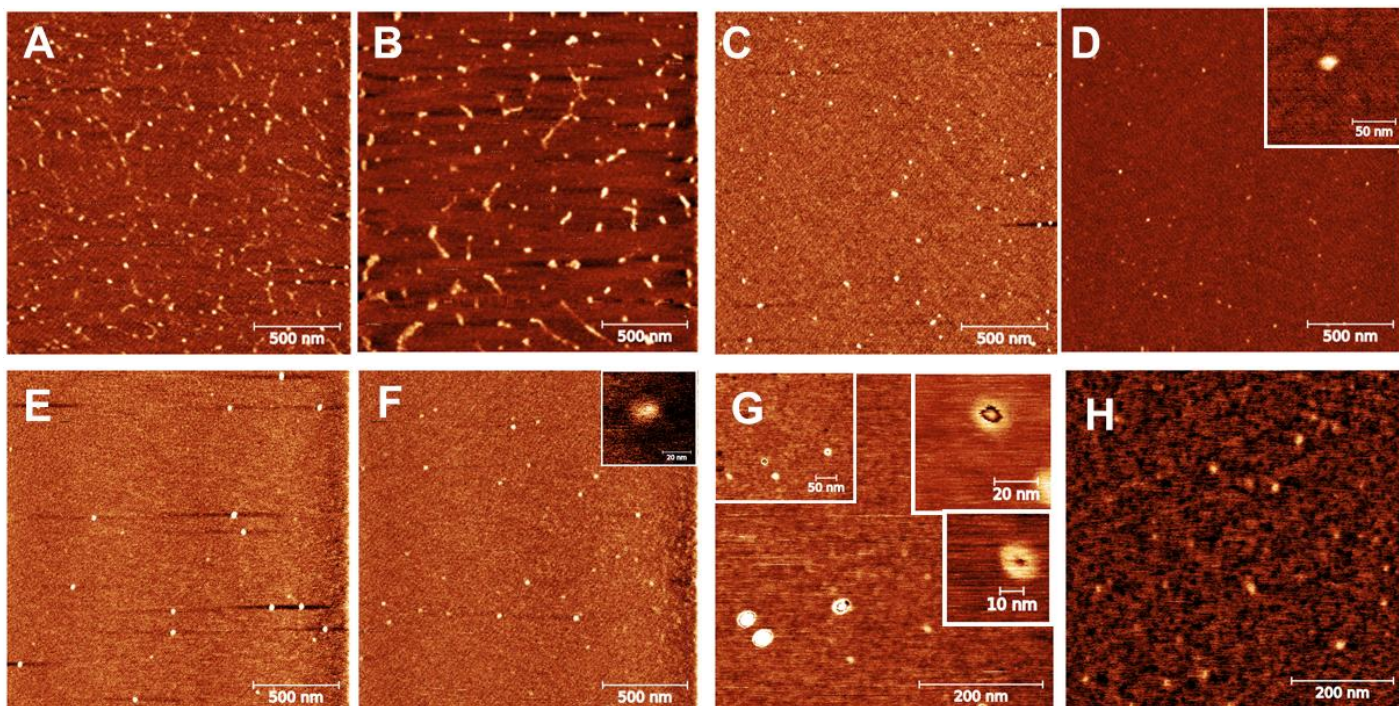

**Figure S11.** Typical AFM images of the studied complexes: M20T1/N20 (A, B), M20/N20T3 (C, D), M20T5/N20T5 (E), M20T5/N20 (F), M20T1/N20T2(G), M20/N20T25 (H).

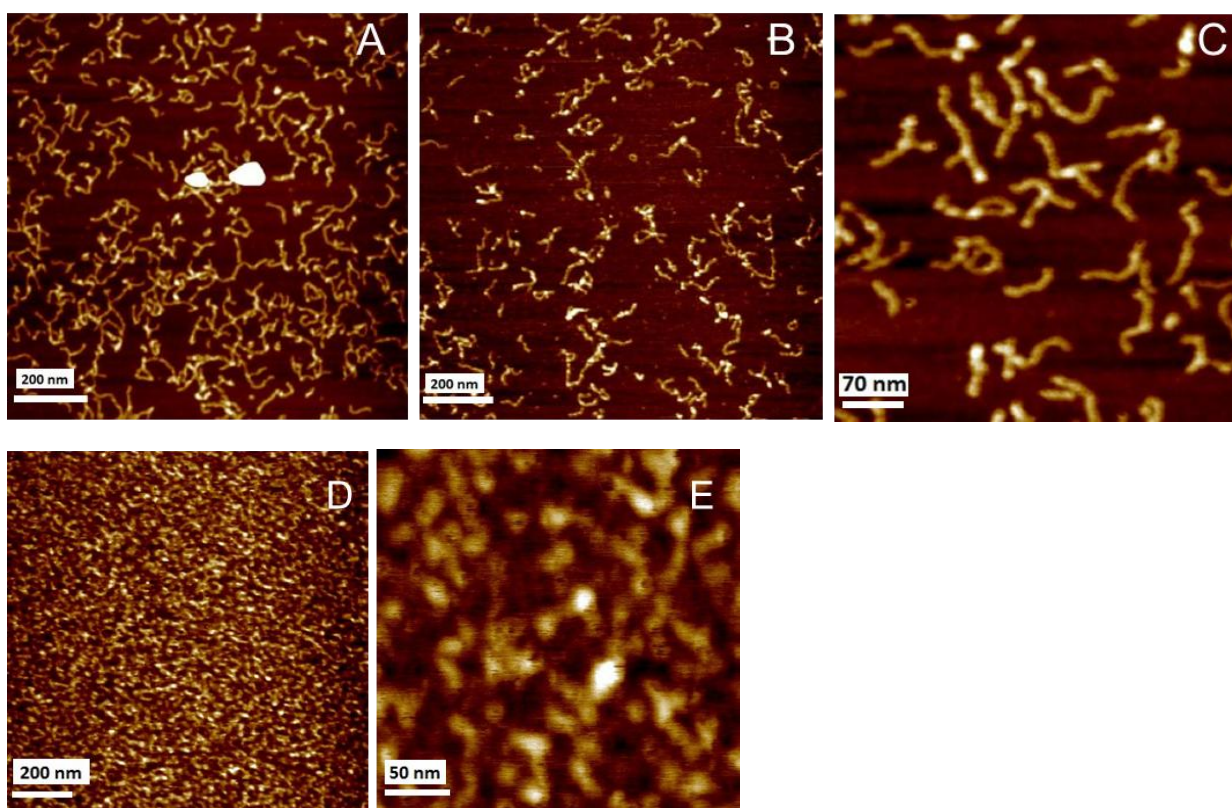

**Figure S12.** Typical AFM images of the studied complexes: M30/N30 (A, B, C), M30D/N30D (D, E).



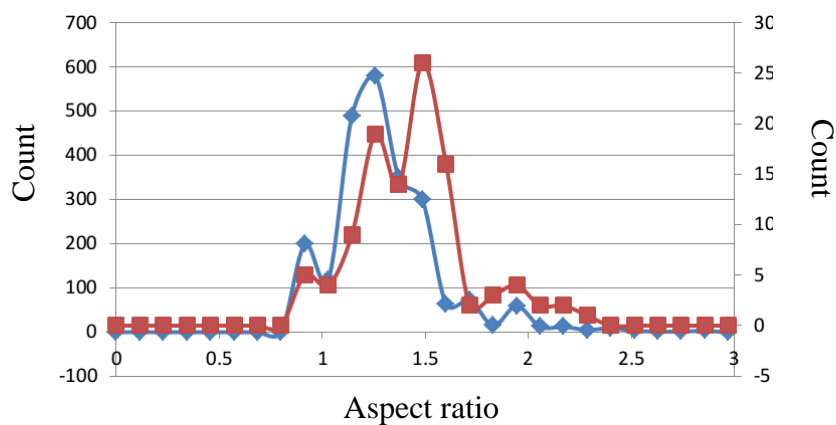

**Figure S13.** Aspect ratio of the complexes M20D/N20D (blue, left axis), M20D/N20Dl/S101 (1:1:1, brown, right axis) obtained by AFM analysis.

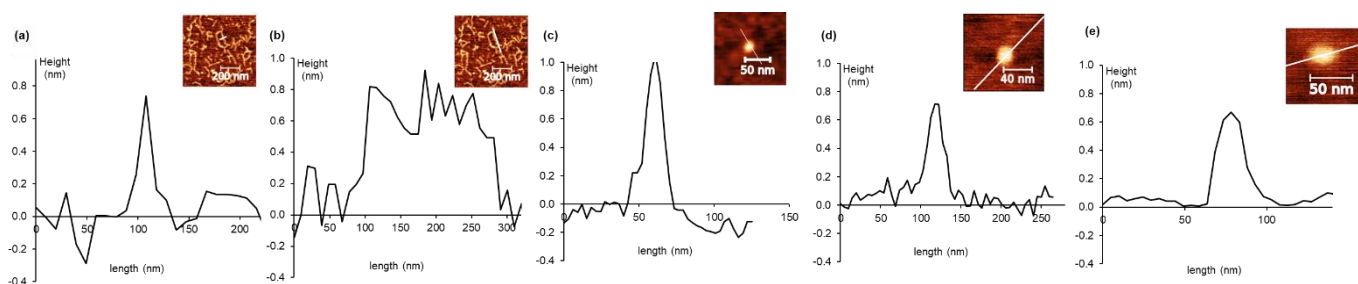

**Figure S14.** Height analysis of the AFM images of the complexes studied: (a), (b) M20/N20; (c) M20D/N20D; (d) M20D/N20Dl; (e) M20D/N20Dl/S101.

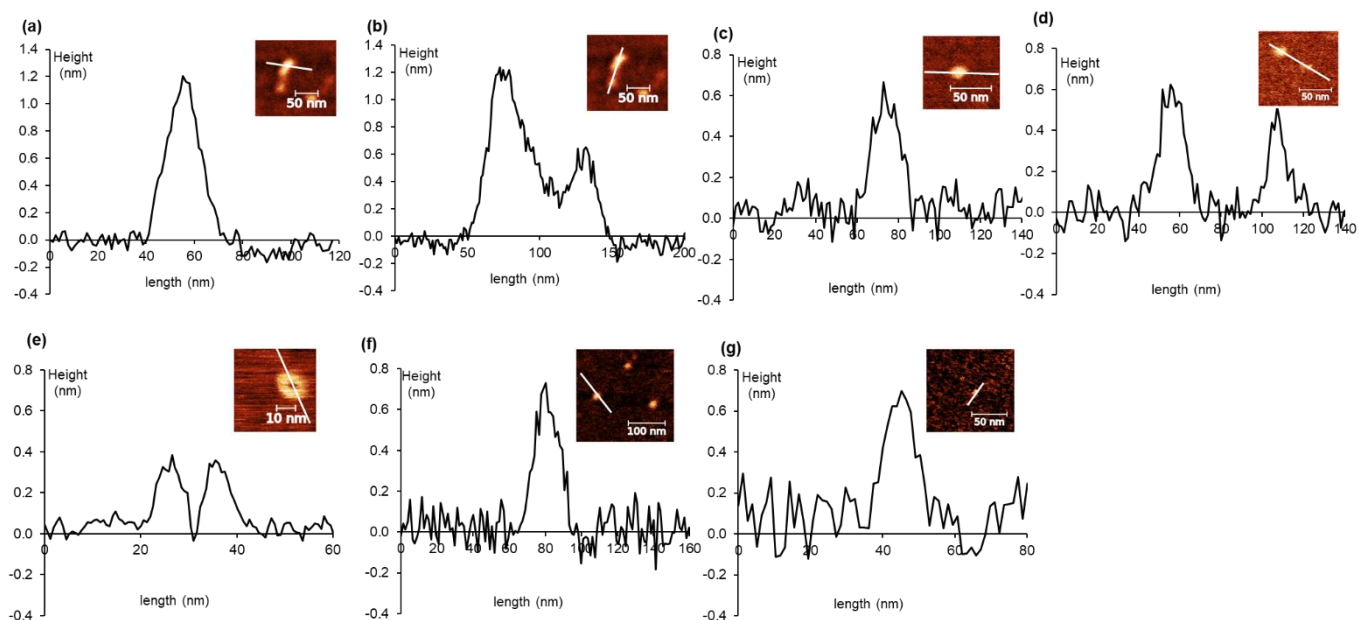

**Figure S15.** Height analysis of the AFM images of the complexes studied: (a), (b) M20T1/N20; (c) M20/N20T3; (d) M20T5/N20; (e) M20T1/N20T2; (f) M20T5/N20T5; (g) M20/N20T25.

## Molecular dynamics simulation and analysis

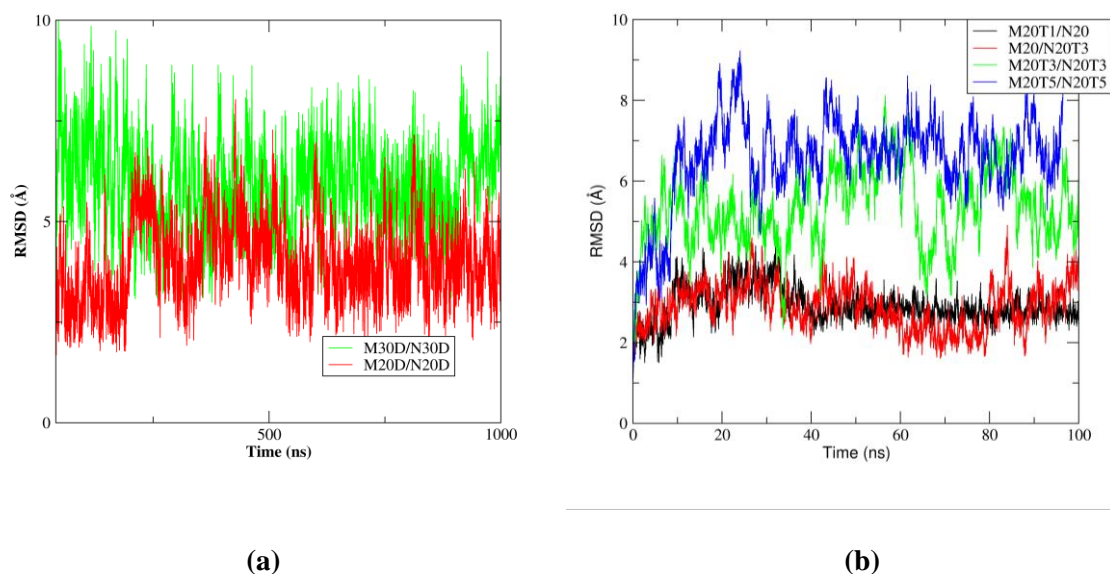

**Figure S16.** RMSD values along the MD trajectories for complexes with (a) non-nucleotide modifications and (b) native with different loop blocks.

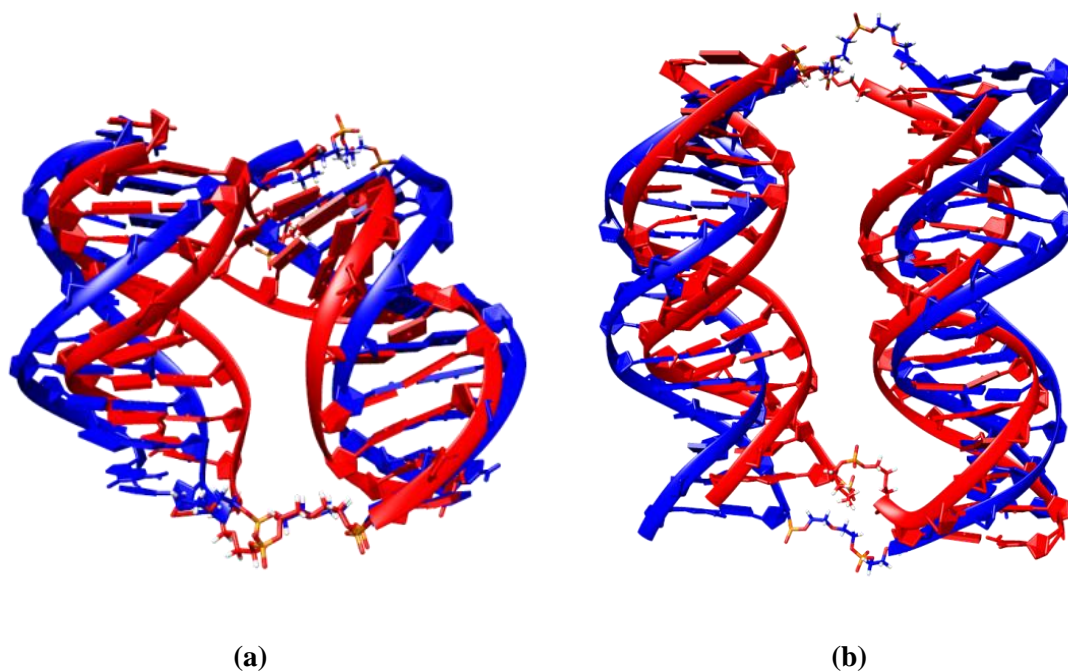

**Figure S17.** Comparison of the most representative structures in MD trajectories obtained by cluster analysis for complexes (a) M20D/N20D and (b) M30D/N30D in the presence of only  $\text{Na}^+$  ions (blue) and in mixture of  $\text{Na}^+$  and  $\text{Mg}^{2+}$  (red). Fifteen magnesium ions were added into simulation box.

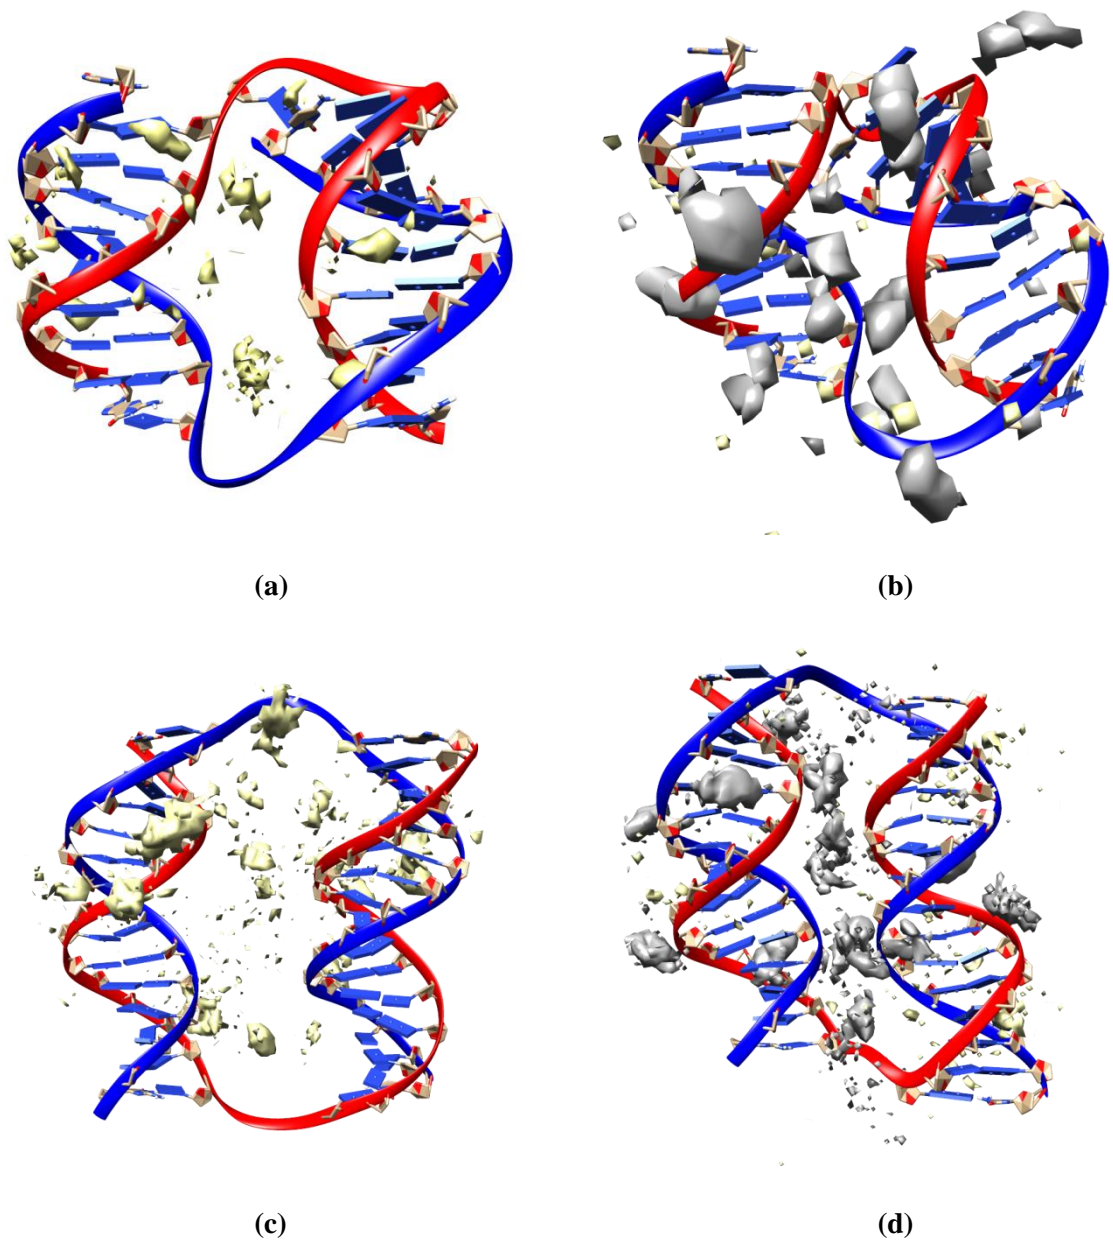

**Figure S18.** Comparison of the sodium (yellow) and magnesium (gray) density maps for complexes **(a,b)** M20D/N20D and **(c,d)** M30D/N30D in the presence of only  $\text{Na}^+$  ions **(a,c)** and in mixture of  $\text{Na}^+$  and  $\text{Mg}^{2+}$  **(b,d)**.

**Table S4.** Summary of cluster analysis of 100 ns MD simulation of studied complexes

|          | M20D/N20D   |                      |       |                       | M30D/N30D   |         |       |          |
|----------|-------------|----------------------|-------|-----------------------|-------------|---------|-------|----------|
| #Cluster | Frac        | AvgDist <sup>1</sup> | Stdev | AvgCDist <sup>2</sup> | Frac        | AvgDist | Stdev | AvgCDist |
| 0        | 0.712       | 4.318                | 1.002 | 6.462                 | 0.366       | 4.342   | 0.904 | 6.212    |
| 1        | 0.188       | 4.132                | 0.954 | 7.487                 | 0.311       | 4.701   | 1.094 | 7.472    |
| 2        | 0.075       | 3.176                | 0.756 | 6.177                 | 0.289       | 4.454   | 0.967 | 6.622    |
| 3        | 0.018       | 4.074                | 0.979 | 7.721                 | 0.027       | 3.698   | 0     | 7.047    |
| 4        | 0.008       | 4.485                | 1.183 | 6.675                 | 0.007       | 0       | 0     | 8.445    |
|          | M20/N20T3   |                      |       |                       | M20T3/N20T3 |         |       |          |
| #Cluster | Frac        | AvgDist              | Stdev | AvgCDist              | Frac        | AvgDist | Stdev | AvgCDist |
| 0        | 0.713       | 2.793                | 0.579 | 3.759                 | 0.605       | 3.283   | 0.678 | 5.277    |
| 1        | 0.108       | 2.734                | 0.401 | 3.839                 | 0.176       | 3.558   | 0.713 | 4.746    |
| 2        | 0.088       | 2.89                 | 0.418 | 3.851                 | 0.142       | 3.061   | 0.854 | 6.016    |
| 3        | 0.071       | 2.019                | 0     | 4.161                 | 0.059       | 2.706   | 0.73  | 5.086    |
| 4        | 0.021       | 1.771                | 0     | 4.101                 | 0.018       | 0       | 0     | 6.231    |
|          | M20T5/N20T5 |                      |       |                       | M20T1/N20   |         |       |          |
| #Cluster | Frac        | AvgDist              | Stdev | AvgCDist              | Frac        | AvgDist | Stdev | AvgCDist |
| 0        | 0.766       | 4.052                | 0.969 | 5.982                 | 0.619       | 2.053   | 0.347 | 3.112    |
| 1        | 0.077       | 3.386                | 0.583 | 7.112                 | 0.165       | 2.437   | 0.448 | 3.415    |
| 2        | 0.069       | 0                    | 0     | 7.691                 | 0.089       | 2.598   | 0.408 | 3.406    |
| 3        | 0.057       | 2.655                | 0.54  | 7.346                 | 0.083       | 2.177   | 0.162 | 3.312    |
| 4        | 0.031       | 0                    | 0     | 6.113                 | 0.045       | 1.831   | 0     | 3.142    |

#Cluster – Cluster number starting from 0 (0 is most populated)

Frac – size of cluster as fraction of total trajectory

AvgDist – average distance between points in the cluster

Stdev - standard deviation of points in the cluster

AvgCDist - average distance of this cluster to every other cluster
